1     **The necessary component of regulatory interactions: identification**  
2             **and characterization of putative regulatory motifs.**  
3             **Case study on the control of seminal fluid proteins through**  
4             **regulatory hubs in *D. melanogaster***

5

6

Irina Mohorianu<sup>1,2,3</sup>

7

8     <sup>1</sup>School of Biological Sciences, University of East Anglia, Norwich Research Park, NR4 7TJ, UK.

9     <sup>2</sup>School of Computing Sciences, University of East Anglia, Norwich Research Park, NR4 7TJ, UK.

10    <sup>3</sup>Oxford Vaccine Group, Medical Sciences Division, University of Oxford

11

12    e-mail: [irina.mohorianu@paediatrics.ox.ac.uk](mailto:irina.mohorianu@paediatrics.ox.ac.uk)

13

14    Running title: Putative regulatory interactions based on the existence of motifs

15    Keywords: gene regulatory networks, regulatory hubs, transferome, miRNAs, transcription  
16    factors.

17 **Abstract**

18 Highly precise, yet flexible and responsive co-ordination of expression across groups of genes  
19 underpins the integrity of many vital functions. However, our understanding of gene  
20 regulatory networks (GRNs) is often hampered by the lack of experimentally tractable  
21 systems, by significant computational challenges derived from the large number of genes  
22 involved or from difficulties in the accurate identification and characterization of gene  
23 interactions. The proposed case study is based on a tractable experimental system: the genes  
24 encoding seminal fluid proteins transferred along with sperm (the 'transferome') in *D.*  
25 *melanogaster* fruit flies. These proteins resulting from the transferome genes are core  
26 determinants of reproductive success, yet we know little about the mechanisms underlying  
27 their tight, responsive and precise regulation. Using only genomic information, we identified  
28 potential regulatory motifs that linked the transferome genes in an interaction network. This  
29 analysis predicted the existence of variation in the strength of regulation across the  
30 transferome genes and revealed evidence for putative 'hubs' linked to either transcriptional or  
31 post-transcriptional control. We tested the role of post-transcriptional regulation in this gene  
32 set by directly manipulating the miRNA biosynthesis pathway. This affected the reproductive  
33 function of the transferome genes by abolishing the ability of males to respond to the threat of  
34 sexual competition. The results identified regulatory mechanisms that can underpin robust,  
35 precise and flexible regulation of important, fitness-related genes.

36

37

## 38 **1. Introduction**

### 39 **Gene regulatory networks**

40 Genes rarely, if ever, function in isolation from one another. They are often interconnected  
41 within gene regulatory networks (GRNs) that regulate a specific pathway or function. Such  
42 GRNs are of vital importance in regulating ubiquitous aspects of development and organismal  
43 function. Genes may be regulated at the transcriptional, or post-transcriptional level via  
44 different mechanisms. Transcription factors (TFs) control the rate of gene transcription by  
45 binding specific DNA motifs, usually upstream of the coding region {Dai, 2012 #4136}.  
46 Post-transcriptional regulation can be achieved by microRNAs (miRNAs) {Bartel, 2004  
47 #3776}, a particular class of small RNAs (sRNAs), which target mRNA transcripts, inhibiting  
48 translation into proteins. miRNAs are processed from a hairpin-like structure by Drosha and  
49 Dicer-1 enzymes (figure 1), and then loaded into the Argonaute protein, part of the RNA  
50 Induced Silencing Complex (RISC), which guides the miRNA to the target mRNA {Bartel,  
51 2009 #4134}. In animals, miRNAs generally induce translational repression in their targets  
52 via matching of the miRNA 'seed' sequence (at positions 2-8 from the 5' end) to the 3'UTR  
53 region of the target mRNA {Brennecke, 2005 #4157}. Other small interfering (si)RNAs (e.g.  
54 21nt siRNAs, repeat associated RNAs rasiRNAs, promoter associated pasRNAs and ~27-30nt  
55 piwi associated piRNAs) are processed by Dicer-2 and recruit different Ago proteins {Kim,  
56 2009 #4158}; many details of their regulatory functions are not yet known {Kim, 2009  
57 #4158}, however early studies indicate a role in transcriptional regulation.

58         Although our knowledge of gene regulation is rapidly growing, the identification and  
59 comparison of inter-relationships between co-regulated genes in GRNs poses significant  
60 challenges {Petralia, 2015 #4394}. For example, GRNs are often inferred from gene  
61 expression profiles, which may have a variable signal to noise ratio {Mitra, 2011 #4395;  
62 Penfold, 2011 #55}. GRNs can also be identified by using protein-protein interactions (e.g.  
63 {Filkov, 2005 #4396; Giot, 2003 #4634}), from steady state and manipulated datasets (e.g.  
64 knock outs) and also via the integration of gene expression with metabolomic data (e.g.  
65 {Gargouri, 2015 #4397}).

66 GRNs range from simple to the very complex, comprising many hundreds of genes  
67 and transcriptions factors {Milo, 2002 #4407}. There is a growing realisation of the valuable  
68 insight that can be gained by identifying and comparing GRNs across different cells and  
69 tissues over time (e.g. {Barabasi, 2004 #4400;Blais, 2005 #4402;Gaiteri, 2014 #4401;Linde,  
70 2015 #4399}). In the study of evolutionary biology there is much interest in determining how  
71 core features of GRNs such as topology, composition, degree of connectivity, robustness to  
72 mutation, clustering and stability change under selection (e.g. {Ravasz, 2002  
73 #4408;Luscombe, 2004 #4403;Ciliberti, 2007 #4404; Crombach, 2008 #4406; MacNeil, 2011  
74 #4405}). A key, and so far unanswered question, is how selection acts in different  
75 environments to achieve network stability and indeed whether one can measure the degree of  
76 stability from characterising core network features (e.g. {Ciliberti, 2007 #4404}). The general  
77 emerging idea is that highly connected genes within networks are likely to be linked or co-  
78 regulated through one or multiple hubs that are essential for network organisation and hence  
79 themselves targets of selection. GRNs may also represent an efficient way to capture and  
80 maintain the effects of beneficial mutations, or to maintain selectively neutral ones  
81 {Crombach, 2008 #4406}.

82 An additional hurdle in the study of GRNs can be the difficulty in identifying an  
83 appropriate set of genes in which to study fundamental network features, both at the level of  
84 gene expression and the resulting phenotype. To facilitate the understanding of such a system,  
85 it should ideally (i) comprise a tightly linked network of genes, (ii) represent a set of genes  
86 within a defined biological process and/or localized expression, (iii) be genetically tractable  
87 for experimental testing, and (iv) produce a well-defined and measureable phenotype. The set  
88 of genes that encode the non-sperm components of the ejaculate in male *D. melanogaster*  
89 fruit flies {Findlay, 2008 #3633} (hereafter the ‘transferome’) fulfils these criteria. They  
90 represent a potentially valuable exemplar for testing features of GRNs because they (i) show  
91 co-ordinated expression {Bertram, 1992 #1210;Monsma, 1988 #493;Herndon, 1997 #1435},  
92 (ii) have defined functions and easily measureable phenotypes {Chapman, 2001 #2713}, and  
93 (iii) can be subjected to controlled, experimental genetic manipulations.

94 **Functions and significance of the reproductive transferome**

95 Seminal fluid proteins that comprise the transferome are of key importance across many  
96 animal taxa {Findlay, 2008 #3633; Ram, 2007 #3619; Sirot, 2014 #4180}. They are more than  
97 a buffer to maintain sperm osmotic potential {Arqvist, 2005 #3181; Chapman, 2008 #4409}.  
98 In *D. melanogaster* these remarkable substances cause a profound remodelling of female  
99 behaviour, physiology, gene expression and fitness (e.g. {Chapman, 2001 #2713} {Gioti,  
100 2012 #4133}). Individual seminal fluid proteins affect egg production, sexual receptivity,  
101 feeding and nutrient balancing, sleep patterns, sperm retention and usage, water balance and  
102 antimicrobial peptide production (reviewed in {Sirot, 2014 #4180}). These actions are  
103 fundamental to reproductive success {Wigby, 2005 #2995; Fricke, 2009 #3927; Fricke, 2009  
104 #3752}. Seminal fluid components in *D. melanogaster* have been well characterized at the  
105 genetic, functional and structural levels {Ram, 2007 #3619}. Isotopic <sup>15</sup>N labelling has  
106 defined a set of ~138 extracellular proteins secreted by the male accessory glands, ejaculatory  
107 ducts and bulb, plus non-sperm molecules from the testes that are transferred to females  
108 during mating {Findlay, 2008 #3633}.

109

110 **The transferome as a GRN that responds to the socio-sexual context**

111 Male *D. melanogaster* exposed to rivals prior to mating for at least 24h mate for significantly  
112 longer and transfer more of key seminal fluid proteins into females {Wigby, 2009 #3855}.  
113 Such responses are precise, robust and flexible {Bretman, 2011 #4155; Bretman, 2012 #4152}.  
114 They result in significantly increased male fitness {Bretman, 2009 #3863} because, in  
115 response to increased transfer of seminal fluid proteins, females lay significantly more eggs  
116 and become significantly less sexually receptive, effects that increase a male's representation  
117 of offspring in future generations {Bretman, 2009 #3863}. Hence ejaculate composition can  
118 be modified in a highly sophisticated manner in response to social and sexual context {Wigby,  
119 2009 #3855; Sirot, 2011 #4156}. This is also underpinned by differential expression in  
120 transferome-encoding genes {Mohorianu, 2017 #4369}. Together these data support the idea  
121 that males calibrate responses to sexual competition with remarkable precision and suggest

122 that the transferome genes are linked in a tight and highly co-ordinated regulation in response  
123 to the environment {Mohorianu, 2017 #4369}. However, little is yet known about how this is  
124 achieved.

125 We hypothesise that an effective way in which to regulate > 130 individual  
126 transferome components within a GRN is to manage them in 'sets' controlled by the same  
127 regulator. This could facilitate rapid and co-ordinated expression of groups of genes when  
128 required. This level of control may be achieved by transcription factors that enhance the  
129 transcription of sets of genes, or by small RNAs that bind to mRNA transcripts and repress  
130 the translation of functionally linked groups of proteins (e.g. {Tibiche, 2008 #4410}). We  
131 adopted a predictive approach to test these ideas. We first tested whether we could identify  
132 known sequence motifs shared between members of the transferome gene set. We used  
133 sequence analysis to detect motifs in the 3' and 5' UTRs of all transferome genes to test for  
134 regulation by microRNAs (miRNAs) or transcription factors (TFs), respectively. The results  
135 showed evidence for shared (putative) regulatory regions at either the 5' UTR, 3' UTR or  
136 both and variation in the number/type of shared regulatory sequences. The results also  
137 suggested the presence of regulatory 'hubs' controlling specific sets of transferome genes. We  
138 further investigated this prediction by manipulating small RNA biosynthesis pathway directly  
139 in order to measure the effect on the transferome phenotype of knocking down an upstream  
140 major component of miRNA (Drosha) biogenesis.

141

## 142 **2. Methods**

143 To detect regulatory signatures, we focused on genes encoding the *D. melanogaster*  
144 seminal fluid transferome components {Findlay, 2008 #3633} as described in v6.11 of the *D.*  
145 *melanogaster* genome build. This resulted in a working set of 136 transferome genes. Our  
146 strategy was first to ascertain whether the 5' UTR, or 3' UTR of these genes were enriched in  
147 motifs linked to TFs or miRNAs, respectively; next a more general window based approach  
148 was used for the identification of other motifs not related to known regulators. All analyses  
149 mapping miRNA seed sites or TF binding motifs to 3'UTR and 5'UTR regions were

150 performed on unique motifs at the transcript level. To account for the presence of different  
151 transcript isoforms corresponding to the same gene (which partially share portions of the  
152 UTRs) we also generated a collapsed version of the results, at gene-level (see tables S1-S4).

153

#### 154 **(a) Regulation of transferome genes by known miRNAs**

155 A conservation analysis was first conducted to identify all miRNAs in the *D. melanogaster*  
156 genome. All mature miRNAs from the 12 *Drosophila* subspecies {Kozomara, 2014 #28}  
157 were mapped on the *D. melanogaster* genome and the miRNA loci then determined using  
158 criteria based upon the identification of miRNA hairpin-like secondary structures  
159 (specifically: adjusted minimal folding free energy (aMFE) < -20 and no branching adjacent  
160 to the miRNA/miRNA\* duplex) a similar approach as in {Mohammed, 2018 #4633}. We  
161 then determined all 7 and 8nt seed regions for all mature miRNAs. miRNAs sharing seed  
162 regions (perfect identity) were collapsed under one entry. Seeds were mapped to the 3' UTRs  
163 of the transferome gene transcripts (with full length matching and no mis-matches or gaps  
164 allowed). The enrichment of miRNA usage was calculated by comparing the number of target  
165 genes for each miRNA seed site, on the transferome transcripts and on all *D. melanogaster*  
166 transcripts, using identical targeting criteria for both analyses. We used the Fisher exact test to  
167 evaluate whether the observed number of putative targets was in line with the expectation  
168 across the *D. melanogaster* genome or whether it was enriched/depleted for transferome  
169 transcripts.

170

#### 171 **(b) Regulation of transferome genes by known TFs**

172 Using similar methodology as in (a), we searched for putative TF binding sites on the 5'  
173 UTRs of transferome transcripts using TF motifs (5-50nt long) from the 'Redfly'  
174 (<http://redfly.ccr.buffalo.edu/>), FlyTF (<http://www.flytf.org/>) and flyatlas ([www.flyatlas.org/](http://www.flyatlas.org/))  
175 databases. Due to the high redundancy in TF motifs, we collapsed motifs with identical  
176 sequences and merged their identifiers; the analysis was conducted on all unique motifs. The  
177 enrichment analysis was done using the same approach and thresholds as for the miRNAs.

178 **(c) Regulation by unknown regulatory elements (sliding window analysis)**

179 The last step was to conduct a sliding windows analysis (with lengths varying from 9 to 21nt,  
180 in increments of 2nt; the overlap of consecutive sliding windows is L-1, where L is the length  
181 of the window) for an unbiased test for regulatory elements. The input for this analysis  
182 consisted of the 5' UTRs and the 3' UTRs of transferome gene sequences. Next, all input  
183 fragments were mapped against all other entries in each dataset, allowing up to 2 mismatches  
184 and eliminating self-matches. Fragments with low sequence complexity were also eliminated.  
185 To identify co-regulated regions we used only matches on the positive strand.

186 **3. Results and Discussion**

187 Overall, we showed significant over-representation among transferome genes of 37 miRNA  
188 seed sequences and 42 TF binding motifs. This was accompanied by a significant under-  
189 representation of TF, miRNA and siRNA binding sites among the transferome set overall.  
190 These results reveal the tight nature of regulation of transferome genes and reveal how a  
191 diverse set of functionally important gene products can be regulated.

192

193 **(a) Regulation of transferome genes by known miRNAs**

194 We first evaluated the over-representation of miRNA target sites among the 3' UTRs of the  
195 transferome genes, when compared to the probability of occurrence in the entire set of *D.*  
196 *melanogaster* 3' UTRs. We found 37 miRNAs whose targets were significantly enriched  
197 amongst transferome transcripts (table S1a). The most significantly enriched target site was  
198 that of miR-4943-5p, which has seed sites in 80 transferome 3' UTRs (corresponding to 42  
199 genes). In contrast to the typical pattern of miRNA biogenesis, the miR-4943 locus spans the  
200 sense strand of an exon/intron boundary in the gene CG5953, rather than from an intronic or  
201 intergenic region. Interestingly, this miRNA appears to be lineage-specific (i.e. restricted to *D.*  
202 *melanogaster*) and expressed at relatively low levels {Berezikov, 2011 #4135}. Further  
203 investigation of this putative miRNA may reveal its role in the regulation of so many  
204 transferome genes.



205 In total, the targeted 3' UTRs of all enriched miRNAs correspond to 71 genes,  
206 approximately half of the transferome set. We observed no particular functional enrichment  
207 for the subset of 71 genes; instead these genes correspond to a broad range of processes  
208 within the transferome.

209 We next explored the presence of miRNA seed sites amongst transferome genes,  
210 regardless of any enrichment compared to the entire genome. We show the predicted target  
211 genes of each known miRNA (table 1b) and the number and identity of miRNA seed sites on  
212 every transferome 3' UTR (table S1c). The interactions between miRNAs that can target the  
213 transferome genes and their corresponding targets are presented as a Cytoscape network  
214 diagram {Shannon, 2003 #4622} (figure S1). It is clear from the node sizes that the majority  
215 of known miRNAs were predicted to target very few transferome genes. Indeed, 213 miRNAs  
216 had only 1-2 seed sites amongst all transferome 3' UTRs. However, it was also apparent that  
217 some miRNAs have putative target sites in many different genes, and so have the potential to  
218 act as regulatory 'hubs', controlling many different genes simultaneously. The miRNAs with  
219 the highest number of predicted target genes were miR-4943-5p (42 genes), miR-4953-3p (17  
220 genes), miR-7-3p (14 genes), miR-315-5p (11 genes) and miR-9369-3p (10 genes) (figure 2).  
221 To investigate if the genes targeted by the same miRNA shared functional profiles, we  
222 performed a GO enrichment analysis on groups of  $\geq 10$  genes, using the list of 136  
223 transferome genes as a reference set (table S5; g:Profiler <http://biit.cs.ut.ee/gprofiler/index.cgi>  
224 {Reimand, 2016 #4623}). We found no GO enrichment of terms for the targets of miR-4943,  
225 miR-4953 or miR-9369. However, significant enrichment of some biological process terms  
226 was found for miR-7 and miR-315 targets. Putative miR-7 targets were enriched for  
227 "organonitrogen compound metabolic process", which characterised 9 of the 14 genes  
228 (*Acp62F*, *trithorax*, *Peritrophin-A*, *ND-51L2*, *Ggt-1*, *CG10862*, *CG10585*, *CG31704*, and  
229 *CG4815*). The products of these genes are all predicted to be involved with protein processing  
230 (e.g. proteases, protease inhibitors, histone modification and chitin binding). However, there  
231 is as yet no evidence that these 9 genes are expressed in a co-ordinated fashion, or whether  
232 their products have pleiotropic effects. For miR-315 targets, 3 of 11 genes were associated

233 with “nervous system development” - *wurstfest*, *trithorax*, and *Esterase-6*. The products of  
234 these genes have diverse functions in translational and transcriptional control, and pheromone  
235 processing {Baker, 2015 #4624; Petruk, 2006 #4625; Chertemps, 2012 #4626}.

236 Of the 136 transferome genes, 104 had at least one putative miRNA target site  
237 incident with a 3' UTR transcript. The genes with the highest number of miRNA target sites  
238 were *trithorax* (putative sites for 50 miRNAs), potentially suggesting chromatin remodelling  
239 {Schuettengruber, 2017 #4635}, and *wurstfest* (putative sites for 42 miRNAs). Since these  
240 genes encode transcriptional and translational regulators, respectively, they may also require  
241 tight regulation themselves. Indeed, there is evidence in mice that genes whose products are  
242 involved in a regulatory role (such as transcription factors) have more predicted miRNA  
243 target sites in their 3' UTRs than housekeeping or structural genes {Zare, 2014 #4627}.  
244 Another 9 genes were predicted to have >15 binding sites corresponding to different miRNAs.  
245 Amongst those genes were three whose products potentially play a role in cell development –  
246 *CG18135* which is known to interact with the unconventional myosin Myo10A {Liu, 2008  
247 #4628}, *CG10433*, which when over-expressed in male flies leads to defective microtubule  
248 organisation {Liu, #4629}, and  *$\beta$ -tubulin at 85D* which has been shown to regulate salivary  
249 gland migration {Jattani, 2009 #4630}. Another two genes, *polyphemus* and *Niemann-Pick*  
250 *type C2b* encode products involved in the immune response {Gonzalez, 2013 #4631; Shi,  
251 2012 #4632}. The remaining four genes with >15 miRNA sites have no experimentally  
252 confirmed functions, but may be involved in chitin-binding (*Peritrophin-A*), calcium ion  
253 binding (*regucalcin*) and protein-folding (*CG2852*). *CG18067* encodes a protein of unknown  
254 function.

255 To gain further insight into whether a subset of genes, whose products are involved in  
256 similar biological processes, could be regulated by miRNA ‘hubs’, we created a network  
257 diagram in Cytoscape {Shannon, 2003 #4622} of 19 genes which have a role in the post-  
258 mating response (PMR) of females (figure 3). We know that ejaculate proteins that affect  
259 sperm storage and female behaviour are precisely controlled by the male fly in response to  
260 sperm competition, so we reasoned that these genes may be co-regulated by the same

261 miRNAs. As for the entire transferome gene set, the most prolific miRNA amongst the PMR  
262 subset was miRNA-4943. Of the 19 genes chosen, 9 had target sites for miR-4943 (*Acp26Ab*,  
263 *Acp36DE*, *Acp53Ea*, *Acp62F*, *antr*, *Ebp*, *lectin-46Ca*, *lectin-46Cb*, and *SP*). Although the  
264 term ‘post-mating behaviour’ was not found to be significantly enriched in the GO analyses  
265 of miR-4943 targets described above, the fact that almost half of the PMR subset have miR-  
266 4943 target sites suggests that this miRNA is still an important regulator of sperm storage and  
267 post-mating response genes. Other potential PMR regulators were miR-972 and miR-289,  
268 which both had complementarity to *CG10433*, *Ebp*, *EbpII*, *lectin-46Ca*, and *SP*. miR-972 was  
269 also predicted to bind *antr*. It is also apparent (figure 3) that some PMR genes have target  
270 sites for an abundance of different miRNAs (e.g. *CG10433*, *Ebp* and *EbpII*), and thus instead  
271 of being regulated by a single ‘hub’, these genes may require very tight control, mediated by  
272 many different regulators.

273 Overall, our results indicate that several miRNAs are predicted to regulate multiple  
274 transferome genes, thereby acting as regulatory ‘hubs’. Groups of genes with seed sites for  
275 the same miRNA are not necessarily enriched for a particular function, suggesting that their  
276 co-ordinated regulation impacts on diverse reproductive processes. In addition, we observed  
277 considerable redundancy in miRNA seed sites for individual genes, i.e. genes with seed sites  
278 corresponding to numerous different miRNAs. This suggests that some transferome genes  
279 may require particularly tight regulation, potentially because they themselves are  
280 transcriptional or translational regulators {Zare, 2014 #4627}.

### 281 **(b) Regulation of transferome genes by known TFs**

282 Next, we evaluated the over-representation of TF binding motifs among the transferome 5’  
283 UTRs, when compared to all *D. melanogaster* transcripts (table S2a). In total, 29 unique TF  
284 motifs were significantly enriched in the transferome transcripts. These 29 motifs are the  
285 binding sites of a potential 30 different transcription factors. The motifs were distributed  
286 among a total of 27 genes. GO enrichment analysis of the 27 targeted genes revealed a  
287 significant over representation of genes encoding proteins involved in microtubule based  
288 processes (*wurstfest*, *α-Tubulin at 84D*, *β-Tubulin at 85D*, *α-Tubulin at 84B*, *Cytoplasmic*

289 *dynein light chain 2*). This may suggest the potential for co-ordinated structural changes in  
290 transferome cells, potentially associated with secretory function. This would be interesting to  
291 test directly, using targeted genetic manipulations.

292 We considered the total number of TF motifs that were present in the 5' UTRs of all  
293 transferome transcripts, regardless of enrichment compared to all *D melanogaster* 5' UTRs,  
294 and presented it as a Cytoscape network in figure S2. Overall, we observed binding motifs for  
295 76 known TFs amongst 43 genes in the transferome set (table S2b). Of these genes, 30 had 5'  
296 UTR motifs for Abd-B. Abd-B is known to be expressed in the secondary cells of the male  
297 accessory gland, and suppression of the Abd-B activator *iab-6* in males affects egg-laying and  
298 receptivity in his mates {Gligorov, 2013 #4329}. The abundance of Abd-B binding motifs  
299 amongst transferome genes provides further support that this transcription factor plays an  
300 important role in the regulation of male seminal proteins.

301 A GO analysis (table S6) revealed the targeted genes of Abd-B were significantly  
302 enriched for the term "microtubule cytoskeleton" – *α-tubulin84B*, *α-tubulin84D*, *β-*  
303 *tubulin85D*, *Cytoplasmic dynein light chain 2*, *trithorax* and *CG2852*. These analyses again  
304 suggest that the co-ordinated regulation of microtubule function by TFs plays a key, and  
305 previously unknown, role in ejaculate secretion.

306 Of the 43 genes with at least one TF binding site motif (table S2c), the most targeted  
307 gene was *CG10433*, with 51 unique motif sequences in the 5' UTR. The 51 motifs represent  
308 binding sites for potentially 45 different transcription factors. *CG10433*, described in section  
309 3a as encoding a protein involved in microtubule organisation {Liu, 2014 #4629}, was also  
310 one of the genes with the most 3' UTR miRNA seed sites. Indeed, of the 11 genes with >15  
311 miRNA seed sites, 5 are also represented amongst the 11 genes with >15 TF binding motifs.  
312 In addition to *CG10433*, the other 4 genes were *CG18135*, *wurstfest*, *Peritrophin-A*, and  
313 *trithorax*. In addition, *Cytoplasmic dynein light chain 2* had 16 TF binding motifs, and 13  
314 miRNA seed sites. This result suggests that these 5 genes, whose products have all been  
315 shown to play key roles in cell development are particularly tightly regulated. It would be  
316 very interesting to determine their functions as secreted proteins in the seminal fluid.

317 Interestingly, TF binding sites were distinctly under-represented in the 5'UTRs of the  
318 19 PMR genes. Only two PMR genes had putative TFBSs - *CG10433* and *Acp53Ea*. As  
319 mentioned above, the product of *CG10433* has a role in microtubule organisation, but has also  
320 been shown to reduce female receptivity to remating when overexpressed in males {Liu, 2014  
321 #4629}. *Acp53Ea* had binding motifs for only one TF – Pannier. An explanation for the  
322 under-representation of TFBSs amongst PMR genes, is that binding motifs could be more  
323 prolific in the promoter regions of the PMR genes, rather than the 5'UTRs, and are therefore  
324 not captured by this study. Alternatively, it is interesting to consider that TFs may not be the  
325 primary regulators of PMR gene expression, and that these particular genes are regulated  
326 post-transcriptionally.

### 327 **(c) Regulation of transferome genes by unknown elements**

328 The sliding window analysis of the 5' and 3'UTRs of all the transferome genes showed  
329 evidence of potential co-regulation of the transferome genes corresponding to known TF,  
330 miRNA as presented above, but also potential novel co-regulatory sequences for both sets.  
331 Within these, there was also evidence for significant variation in the degree of shared  
332 regulation, with some genes showing regulatory similarities with > 50 transferome genes.  
333 Genes predicted as tightly regulated (sharing regulatory sequences at the 5' and 3' regions)  
334 included protein phosphatase Y regulator 1; Odorant receptor (Or)82a; Serpin 77Bc, 38F;  
335 male specific RNA 57Db. Examples with high 3' and low 5' regulatory similarities: Serpin  
336 28F; Odorant binding protein (Obp)22a; Lectin 46Ca; Accessory gland protein (Acp)24A4  
337 and Andropin). The reverse situation (tight 5' but not 3' regulation) occurred in Met75Ca;  
338 NUCB1; Serpin 77Bb. To determine the probability of obtaining these results by chance we  
339 chose 130 genes at random and repeated analyses using the same parameters (5' and 3' 2kb  
340 regions, low complexity discarded). This procedure was then iterated 100 times. For 5'  
341 regions we detected ~4 times (standard deviation, sd=0.5) more putative shared regulatory  
342 regions in the transferome than in randomly selected genes. Similarly, for the 3' UTR there  
343 were 1.5 (sd=0.12) times more putative regulatory regions, rising to 2.7x more such regions  
344 (sd =0.33). The results suggest that sets of transferome genes vary in the degree to which they

345 are regulated, with some having tight regulation, as indicated by the presence of known and  
346 unknown regulatory regions in the 3' and 5'UTRs. The functional significance of this is not  
347 yet clear.

348

#### 349 **4. Conclusions**

350 The results showed evidence for the presence of regulatory elements that modulate the  
351 expression of seminal fluid transferome genes in *D. melanogaster*. Cross referencing the 5'  
352 and 3' UTRs of transferome genes to known databases showed evidence for under  
353 representation of regulatory motifs in general coupled with significant over-representation of  
354 motifs for specific TF binding sites and miRNA seed sequences. Interestingly, several  
355 miRNAs were predicted as putative regulatory hubs, with seed sequences mapping to  
356 multiple transferome genes. We also observed variation in the degree of regulation across the  
357 transferome genes, with some sets of genes putatively regulated via mechanisms operating at  
358 both 5' and 3' UTRs. The prediction of transcriptional regulation of transferome genes via  
359 known TFs was consistent with published reports (e.g. {Gligorov, 2013 #4329}). The  
360 prediction involving miRNAs is novel and was supported by experimental validation.  
361 Silencing of miRNA biosynthesis by *drossha* knockdown altered the expression of the  
362 transferome phenotype and resulted in males that were no longer able to respond to  
363 competition with male rivals by reducing the probability of remating by their current mates.

364 The results indicated that cross referencing of regulatory regions to existing databases  
365 and unbiased methods for detecting regulation of unknown origin has the potential to reveal  
366 signatures of gene regulation. This variation in number or type of regulatory interactions  
367 would be interesting to study further. The potential fitness benefits of multiple layers of  
368 regulatory control can be studied by manipulating individual regulatory components.

369 We propose that the layers of gene regulation, mediated by specific TFs and miRNAs  
370 is important to facilitate a robust and precise response in many tens of different genes. The  
371 next steps are to test this hypothesis experimentally on a genome-wide scale and to determine

372 whether this is an emergent property of efficient GRNs. Whether there is any functional  
373 significance to the potential for regulation by TFs versus miRNAs is not yet apparent, but will  
374 be important to resolve.

375

376 **Competing interests.** We declare we have no competing interests.

377 **Funding.** We thank the BBSRC (BB/L003139/1; research grant to Tracey Chapman, Tamas  
378 Dalmay and Irina Mohorianu) for funding.

379

## 380 **References**

- 381 1. Dai Q, Smibert P, Lai EC. 2012 Exploiting *Drosophila* genetics to understand microRNA  
382 function and regulation. *Curr. Top. Genet. Dev.* **99**, 201-235.
- 383 2. Bartel DP. 2004 MicroRNAs: genomics, biogenesis, mechanism, and function. *Cell* **116**,  
384 281-297.
- 385 3. Bartel DP. 2009 MicroRNAs: Target recognition and regulatory functions. *Cell* **136**, 215-  
386 233.
- 387 4. Brennecke J, Stark A, Russell RB, Cohen SM. 2005 Principles of microRNA-target  
388 recognition. *PLoS Biol.* **3**, 404-418.
- 389 5. Kim VN, Han J, Siomi MC. 2009 Biogenesis of small RNAs in animals. *Nat. Rev. Mol.*  
390 *Cell Biol.* **10**, 126-139.
- 391 6. Petralia F, Wang P, Yang J, Tu Z. 2015 Integrative random forest for gene regulatory  
392 network inference. *Bioinform.* **31**, i197-i205.
- 393 7. Mitra S, Das R, Hayashi Y. 2011 Genetic networks and soft computing. *IEEE/ACM Trans.*  
394 *Comp. Biol. Bioinform.* **8**, 94-107.
- 395 8. Penfold CA, Wild DL. 2011 How to infer gene networks from expression profiles, revisited.  
396 *Interface Focus* **1**, 857-870.
- 397 9. Filkov V. 2005 Identifying gene regulatory networks from gene expression data. *Handbook*  
398 *of Computational Molecular Biology, Chapman & Hall/CRC Computer and*  
399 *Information Science Series*, **27**.
- 400 10. Giot L, Bader JS, Brouwer C, Chaudhuri A, Kuang B, et al. 2003 A protein interaction  
401 map of *Drosophila melanogaster*. *Science* **302**, 1727-1736.
- 402 11. Gargouri M, Park JJ, Holguin FO, Kim MJ, Wang H, et al. 2015 Identification of  
403 regulatory network hubs that control lipid metabolism in *Chlamydomonas reinhardtii*.  
404 *J. Exp. Bot.* **66**, 4551-4566.
- 405 12. Milo R, Shen-Orr S, Itzkovitz S, Kashtan N, Chklovskii D, et al. 2002 Network motifs:  
406 simple building blocks of complex networks. *Science* **298**, 824-827.
- 407 13. Barabasi AL, Oltvai ZN. 2004 Network biology: understanding the cell's functional  
408 organization. *Nat. Rev. Genet.* **5**, 101-113.
- 409 14. Blais A, Dynlacht BD. 2005 Constructing transcriptional regulatory networks. *Genes Dev.*  
410 **19**, 1499-1511.
- 411 15. Gaiteri C, Ding Y, French B, Tseng GC, Sibille E. 2014 Beyond modules and hubs: the  
412 potential of gene coexpression networks for investigating molecular mechanisms of  
413 complex brain disorders. *Genes Brain Behav.* **13**, 13-24.
- 414 16. Linde J, Schulze S, Henkel SG, Guthke R. 2015 Data- and knowledge-based modeling of  
415 gene regulatory networks: an update. *EXCLI Journal* **14**, 346.
- 416 17. Ravasz E, Somera AL, Mongru DA, Oltvai ZN, Barabási AL. 2002 Hierarchical  
417 organization of modularity in metabolic networks. *Science* **297**, 1551-1555.



- 418 18. Luscombe NM, Babu MM, Yu H, Snyder M, Teichmann SA, et al. 2004 Genomic  
419 analysis of regulatory network dynamics reveals large topological changes. *Nature*  
420 **431**, 308-312.
- 421 19. Ciliberti S, Martin OC, Wagner A. 2007 Innovation and robustness in complex regulatory  
422 gene networks. *Proc. Natl Acad Sci USA* **104**, 13591-13596.
- 423 20. Crombach A, Hogeweg P. 2008 Evolution of evolvability in gene regulatory networks. .  
424 *PLoS Comput. Biol.* **4**: e1000112.
- 425 21. MacNeil LT, Walhout AJ. 2011 Gene regulatory networks and the role of robustness and  
426 stochasticity in the control of gene expression. *Genome Res* **21**, 645-657.
- 427 22. Findlay GD, Yi X, MacCoss MJ, Swanson WJ. 2008 Proteomics reveals novel *Drosophila*  
428 seminal fluid proteins transferred at mating. *PLoS Biol.* **6**, e178.
- 429 23. Bertram MJ, Akerkar GA, Ard RL, Gonzalez C, Wolfner MF. 1992 Cell type-specific  
430 gene-expression in the *Drosophila melanogaster* male accessory-gland. *Mech. Dev.*  
431 **38**, 33-40.
- 432 24. Monsma SA, Wolfner MF. 1988 Structure and expression of a *Drosophila* male accessory  
433 gland gene whose product resembles a peptide prehormone precursor. *Genes Dev.* **2**,  
434 1063-1073.
- 435 25. Herndon LA, Chapman T, Kalb JM, Lewin S, Partridge L, et al. 1997 Mating and  
436 hormonal triggers regulate accessory gland gene expression in male *Drosophila*. *J*  
437 *Insect Physiol.* **43**, 1117-1123.
- 438 26. Chapman T. 2001 Seminal fluid-mediated fitness traits in *Drosophila*. *Heredity* **87**, 511-  
439 521.
- 440 27. Ram KR, Wolfner MF. 2007 Seminal influences: *Drosophila* Acps and the molecular  
441 interplay between males and females during reproduction. *Int. Comp. Biol.* **47**, 427-  
442 445.
- 443 28. Sirot LK, Wong A, Chapman T, Wolfner MF. 2014 Sexual conflict and seminal fluid  
444 proteins: a dynamic landscape of sexual interactions. In: Rice WR, Gavrilets S,  
445 editors. *Sexual Conflict* CSHL Press.
- 446 29. Arnqvist G, Rowe L. 2005 *Sexual Conflict*. Krebs JR, Clutton-Brock T, Editors. Princeton,  
447 NJ: Princeton University Press. 330 pp.
- 448 30. Chapman T. 2008 The soup in my fly: evolution, form and function of seminal fluid  
449 proteins. *PLoS Biol.* **6**, e179.
- 450 31. Gioti A, Wigby S, Wertheim B, Schuster E, Martinez P, et al. 2012 Sex peptide of *D.*  
451 *melanogaster* males is a global regulator of reproductive processes in females. *Proc.*  
452 *Roy. Soc. B* **279**, 4423-4432.
- 453 32. Wigby S, Chapman T. 2005 Sex peptide causes mating costs in female *Drosophila*  
454 *melanogaster*. *Curr. Biol.* **15**, 316-321.
- 455 33. Fricke C, Perry J, Chapman T, Rowe L. 2009 Conditional economics of sexual conflict.  
456 *Biol. Lett.* **5**, 671-674.
- 457 34. Fricke C, Wigby S, Hobbs R, Chapman T. 2009 The benefits of male ejaculate sex  
458 peptide transfer in *Drosophila melanogaster*. *J. Evol. Biol.* **22**, 275-286.
- 459 35. Wigby S, Sirot LK, Linklater JR, Buehner N, Calboli FCF, et al. 2009 Seminal fluid  
460 protein allocation and male reproductive success. *Curr. Biol.* **19**, 1-7.
- 461 36. Bretman A, Westmancoat JD, Gage MJG, Chapman T. 2011 Multiple, redundant cues  
462 used by males to detect mating rivals. *Curr. Biol.* **21**, 617-622.
- 463 37. Bretman A, Westmancoat JD, Gage MJG, Chapman T. 2012 Individual plastic responses  
464 by males to rivals reveal mismatches between behaviour and fitness outcomes. *Proc.*  
465 *Roy. Soc. B* **279**, 2868-2876.
- 466 38. Bretman A, Fricke C, Chapman T. 2009 Plastic responses of male *D. melanogaster* to the  
467 level of sperm competition increase male reproductive fitness. *Proc. Roy. Soc. B* **276**,  
468 1705-1711.
- 469 39. Sirot LK, Wolfner MF, Wigby S. 2011 Protein-specific manipulation of ejaculate  
470 composition in response to female mating status in *Drosophila melanogaster*. *Proc.*  
471 *Natl. Acad. Sci. USA* **24**, 9922-9926.



- 472 40. Mohorianu I, Bretman A, Smith DT, Fowler E, Dalmay T, et al. 2017 Genomic responses  
473 to socio-sexual environment in male *Drosophila melanogaster* exposed to conspecific  
474 rivals. *RNA* **23**, 1048-1059.
- 475 41. Tibiche C, Wang E. 2008 MicroRNA regulatory patterns on the human metabolic network.  
476 *Open Syst. Biol. J.* **1**, 1.
- 477 42. Kozomara A, Griffiths-Jones S. 2014 miRBase: annotating high confidence microRNAs  
478 using deep sequencing data. *Nucl. Acids Res.* **42**, D68-D73.
- 479 43. Mohammed J, Flynt AS, Panzarino AM, Mondal MMH, DeCruz M, et al. 2018 Deep  
480 experimental profiling of microRNA diversity, deployment, and evolution across the  
481 *Drosophila* genus. *Genome Res.* **28**, 1-14.
- 482 44. Chapman T, Bangham J, Vinti G, Seifried B, Lung O, et al. 2003 The sex peptide of  
483 *Drosophila melanogaster*: female post-mating responses analyzed by using RNA  
484 interference. *Proc. Natl. Acad. Sci. USA* **100**, 9923-9928.
- 485 45. R Development Core Team 2015 R: A Language and Environment for Statistical  
486 Computing. In. *R Foundation for Statistical Computing*. Vienna, Austria.
- 487 46. Berezikov E, Robine N, Samsonova A, Westholm JO, Naqvi A, et al. 2011 Deep  
488 annotation of *Drosophila melanogaster* microRNAs yields insights into their  
489 processing, modification, and emergence. *Genome Res.* **21**, 203-215.
- 490 47. Shannon P, Markiel A, Ozier O, Baliga NS, Wang JT, et al. 2003 Cytoscape: a software  
491 environment for integrated models of biomolecular interaction networks. *Genome Res.*  
492 **13**, 2498-2504
- 493 48. Reimand J, Arak T, Adler P, Kolberg L, Reisberg S, et al. 2016 g:Profiler—a web server  
494 for functional interpretation of gene lists (2016 update). *Nucl. Acids Res.* **44**, W83–  
495 W89.
- 496 49. Baker CC, Gim BS, T. FM. 2015 Cell type-specific translational repression of Cyclin B  
497 during meiosis in males. *Dev.* **142**, 3394-3402.
- 498 50. Petruk S, Sedkov Y, Riley KM, Hodgson J, Schweisguth F, et al. 2006 Transcription of  
499 bxd noncoding RNAs promoted by trithorax represses Ubx in cis by transcriptional  
500 interference. *Cell* **127**, 1209-1221.
- 501 51. Chertemps T, François A, Durand N, Rosell G, Dekker T, et al. 2012 A carboxylesterase,  
502 Esterase-6, modulates sensory physiological and behavioral response dynamics to  
503 pheromone in *Drosophila*. *BMC Biol.* **10**, 56.
- 504 52. Zare H, Khodursky A, Sartorelli V (2014) An evolutionarily biased distribution of  
505 miRNA sites toward regulatory genes with high promoter-driven intrinsic  
506 transcriptional noise. *BMC Evol. Biol.* **14**, 74.
- 507 53. Liu R, Woolner S, Johndrow JE, Metzger D, Flores A, et al. 2008 Sisyphus, the  
508 *Drosophila* myosin XV homolog, traffics within filopodia transporting key sensory  
509 and adhesion cargos. *Dev.* **135**. 53-63.
- 510 54. Liu C, Wanga J-L, Zheng Y, Xionga E-J, Li J-J, et al. 2014 Wolbachia-induced paternal  
511 defect in *Drosophila* is likely by interaction with the juvenile hormone pathway.  
512 *Insect Biochem. Mol. Biol.* **49**, 49-58.
- 513 55. Jattani R, Patel U, Kerman B, Myat MM. 2009 Deficiency screen identifies a novel role  
514 for beta 2 tubulin in salivary gland and myoblast migration in the *Drosophila* embryo.  
515 *Dev. Dynam.* **238**, 853-863.
- 516 56. Gonzalez EA, Garg A, Tang J, Nazario-Toole AE, Wu LP. 2013 A glutamate-dependent  
517 redox system in blood cells is integral for phagocytosis in *Drosophila melanogaster*.  
518 *Curr. Biol.* **23**, 2319–2324.
- 519 57. Shi X-Z, Zhong X, Yu X-Q. 2012 *Drosophila melanogaster* NPC2 proteins bind bacterial  
520 cell wall components and may function in immune signal pathways. *Insect Biochem.*  
521 *Mol. Biol.* **42**, 545-556.
- 522 58. Gligorov D, Sitnik JL, Maeda RK, Wolfner MF, Karch F. 2013 A novel function for the  
523 Hox gene Abd-B in the male accessory gland regulates the long-term female post-  
524 mating response in *Drosophila*. *PLoS Genet.* **9**. e1003395.

- 525 59. Fedorka KM, Winterhalter WE, Ware B. 2011 Perceived sperm competition intensity  
526 influences seminal fluid protein production prior to courtship and mating. *Evolution*  
527 **65**, 584-590.
- 528 60. Liu H, Kubli E. 2003 Sex peptide is the molecular basis of the sperm effect in *Drosophila*  
529 *melanogaster*. *Proc. Natl. Acad. Sci. USA* **100**, 9929-9933.  
530

531 **Figures**

532 **Figure 1.** miRNA biogenesis. The miRNA biosynthesis pathway in *D. melanogaster* to  
533 indicate the drosha manipulation applied in the experimental manipulations.

534

535 **Figure 2.** Four examples of miRNAs as putative regulatory hubs. Secondary structures of  
536 four miRNAs with 100% complementarity between the 7-mer seed region (indicated by curly  
537 brackets) and the 3'UTRs of multiple transferome-encoding genes. (a) The 7-mer seed region  
538 of miR-4953-3p has matches to the 3'UTR of 17 genes (b) The seed-site of miR-7-3p  
539 matches 14 genes (c) The seed site of miR-4943-5p matches 42 genes (d) The seed-site of  
540 miR-315-5p matches 11 genes. The gene names are coloured according to broad functional  
541 categories: postmating behaviour/response (green); protein processing (blue); response to  
542 stimulus (purple); metabolic process (yellow); development/cellular organisation (red); gene  
543 expression (orange); unknown function (grey).

544

545 **Figure 3.** miRNA regulation of the post-mating response. Network of putative interactions  
546 between miRNAs (colourless nodes) and transferome genes (green nodes) whose products  
547 have a function in sperm storage and the post-mating response (PMR) of females. The size of  
548 the node is proportional to the number of edges.

549

550

551

552

553 **SI Tables**

554 **Table S1. (a)** miRNAs whose seed sites are significantly over- or under-represented (Fisher  
555 exact test,  $p < 0.05$ ) amongst the 3'UTRs of the seminal fluid protein transferome transcripts,  
556 when compared to all *D. melanogaster* 3'UTR sequences. The proportion of 3'UTRs with the  
557 seed site for a given miRNA is shown for the transferome transcripts (% transferome) and all  
558 *D. melanogaster* transcripts (% all). The direction of enrichment is indicated (1 = over-  
559 represented and -1 = under-represented in transferome 3'UTRs). **(b)** miRNAs with seed sites  
560 present in the 3'UTR of transferome genes. The total number of genes with seed sites for each  
561 miRNA, and the identities of those genes are shown in the second and third columns. **(c)**  
562 Transferome genes with seed sites for miRNAs within the 3'UTRs. The number and identities  
563 of miRNAs with seed sites in a given transferome 3'UTR are presented in the third and fourth  
564 columns.

565

566 **Table S2. (a)** Transcription factor binding motifs which are significantly over- or under-  
567 represented (Fisher exact test,  $p < 0.05$ ) amongst the 5'UTRs of the seminal fluid protein  
568 transferome transcripts when compared to all *D. melanogaster* 5'UTR sequences. The  
569 proportion of 5'UTRs with a binding motif for a given transcription factor is shown for the  
570 transferome transcripts (% transferome) and all *D. melanogaster* transcripts (% all). The  
571 direction of enrichment is indicated (1 = over-represented and -1 = under-represented in  
572 transferome 5'UTRs). **(b)** Transcription factors with binding motifs present in the 5'UTR of  
573 transferome genes. The total number of genes with motifs for each transcription factor, and  
574 the identities of those genes are presented in columns 2 and 3. **(c)** Transferome genes with  
575 binding motifs for transcription factors within the 5'UTRs. The number and identities of  
576 transcription factors with motifs in a given transferome 5'UTR are presented in columns 2  
577 and 3.

578

579 **Table S3. (a)** for each miRNA which could target one of the transferome transcripts, we  
580 counted the number of targeted transcripts (#transcripts) and presented their identity. **(b)** For

581 each transferome transcript, we counted the number of miRNA seed sites present on the 3'  
582 UTR (#miRNA column), able to induce translational repression {Bartel, 2009 #4134}; the  
583 identity of these miRNA seed sites is presented in the third column.

584

585 **Table S4. (a)** for each transcription factor (TF) which could target one of the transferome  
586 transcripts, we counted the number of targeted transcripts (#transcripts column) and presented  
587 their identity. The *D. melanogaster* TFs were downloaded from the REDfly database. **(b)** For  
588 each transferome transcript, we counted the number of TF motifs present on the 5' UTR (#tf  
589 column), able to induce transcriptional silencing {Bartel, 2009 #4134}; the identity of these  
590 TF motifs is presented in the third column.

591

592 **Table S5.** Gene ontology analysis of groups of transferome genes sharing the same putative  
593 miRNA seed sequence in the 3'UTR regions. Analyses were performed using the g:profiler  
594 software {Reimand, 2016 #4623}.

595

596 **Table S6.** Gene ontology analysis of groups of transferome genes sharing the same putative  
597 TF binding motif in the 5'UTR regions. Analyses were performed using the g:profiler  
598 software {Reimand, 2016 #4623}.

599

600

## 601 **SI Figures**

602 **Figure S1.** miRNA regulation of the transferome genes. Network of putative interactions  
603 between miRNAs (colourless nodes) and transferome genes whose products have a function  
604 in: development/cellular organisation (red), gene expression (orange), post-mating  
605 behaviour/response (green), response to stimulus (purple), metabolic process (yellow), protein  
606 processing (blue), unknown function (grey). Node size is directly proportional to the number  
607 of edges.

608

609 **Figure S2.** Transcription factor (TF) regulation of the transferome genes. Network of putative  
610 interactions between TFs (colourless nodes) and transferome genes whose products have a  
611 function in: development/cellular organisation (red), gene expression (orange), post-mating  
612 behaviour/response (green), response to stimulus (purple), metabolic process (yellow), protein  
613 processing (blue), unknown function (grey). Node size is directly proportional to the number  
614 of edges.  
615

616 **Figure 1.**

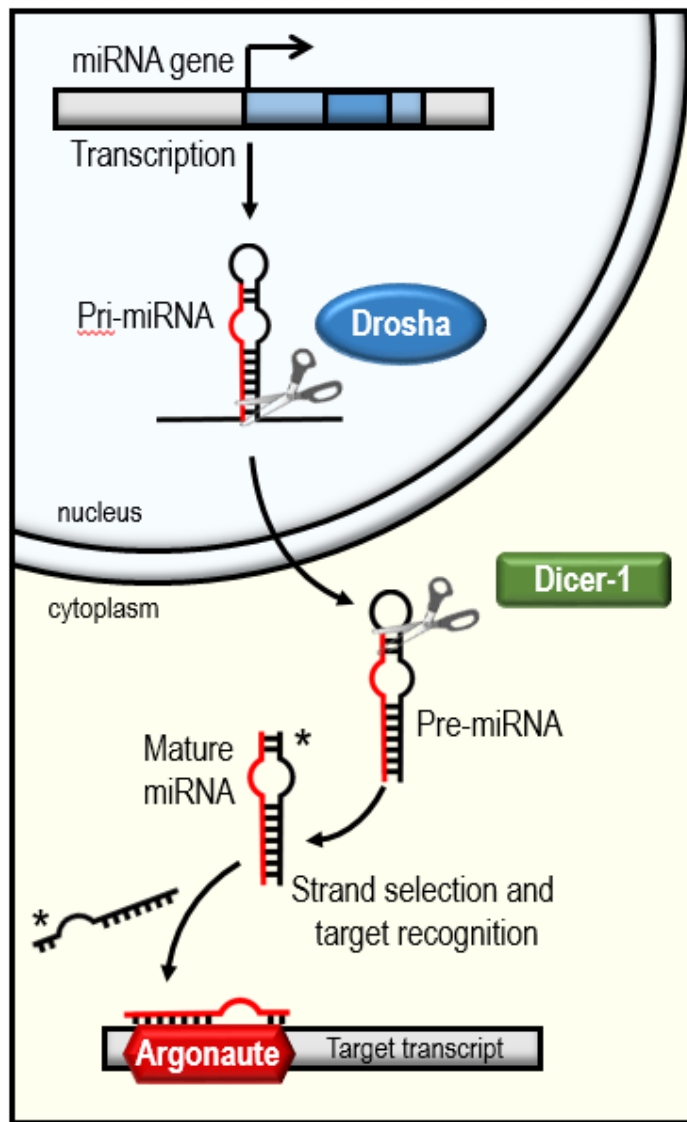

617

618

619

620

621

622

623

624

625

626

627 **Figure 2.**

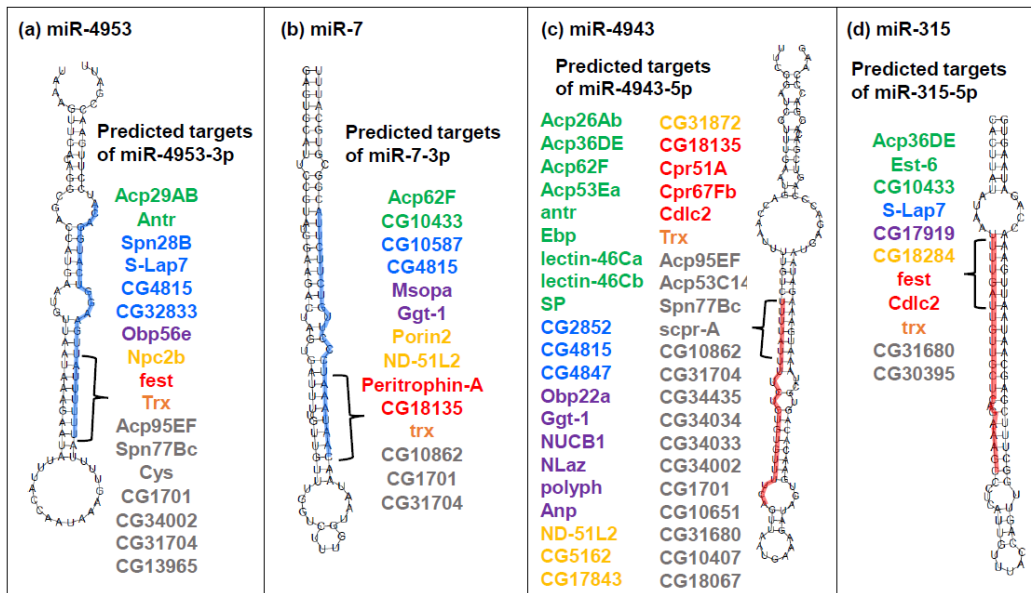

628

629

630

631

632

633

634

635

636

637

638

639

640

641

642

643

644

645

646

647

648

649





652
